# Supplementary material for: Malaria incidence from 2005–2013 and its associations with meteorological factors in Guangdong, China
Source: Springer Nature journal article supplement (doi:10.1186/s12936-015-0630-6), 2015-03-17
Supplement: MOESM1 [file 9761142]

**Additional file 1: The results of the Granger causality Wald test for climate factors:**

| <b>Climate factors</b>            | <b>Chi-square</b> | <b>Degree of freedom</b> | <b>P-value</b> |
|-----------------------------------|-------------------|--------------------------|----------------|
| Mean temperature (°C)             | 38.85             | 15                       | <0.001         |
| Minimum temperature (°C)          | 34.42             | 15                       | 0.003          |
| Maximum temperature (°C)          | 37.59             | 15                       | 0.001          |
| Precipitation (mm/week)           | 37.53             | 15                       | 0.001          |
| Duration of sunshine (hour/week)  | 29.79             | 15                       | 0.013          |
| Mean wind speed (m/s)             | 32.90             | 15                       | 0.005          |
| Mean relative humidity (%)        | 32.33             | 15                       | 0.006          |
| Minimum atmosphere pressure (hPa) | 29.84             | 15                       | 0.013          |
| Maximum atmosphere pressure (hPa) | 44.43             | 15                       | <0.001         |
| Mean atmosphere pressure (hPa)    | 36.11             | 15                       | 0.002          |
| Diurnal temperature range (°C)    | 21.23             | 15                       | 0.130          |
| Maximum wind speed (m/s)          | 11.83             | 15                       | 0.692          |
| Extreme wind speed (m/s)          | 12.00             | 15                       | 0.679          |
