# Supplementary material for: Malaria incidence from 2005–2013 and its associations with meteorological factors in Guangdong, China
Source: Springer Nature journal article supplement (doi:10.1186/s12936-015-0630-6), 2015-03-17
Supplement: MOESM2 [file 9761142]

**Additional file 2: Likelihood Akaike information criteria for quasi-Poisson (Q-AIC) values for different models:**

All the dfs were selected from 3-5 for mean temperature, precipitation, duration of sunshine and mean wind with smallest AIC. The bold value refers to the Q-AIC value of the final model.

| df of wind speed | df of duration of sun | df of temperature | df of precipitation |        |        |
|------------------|-----------------------|-------------------|---------------------|--------|--------|
|                  |                       |                   | 3                   | 4      | 5      |
| 3                | 3                     | 3                 | <b>1697.5</b>       | 1701.5 | 1701.5 |
| 3                | 3                     | 4                 | 1702.8              | 1706.6 | 1706.9 |
| 3                | 3                     | 5                 | 1709.1              | 1713.5 | 1713.9 |
| 3                | 4                     | 3                 | 1705.0              | 1708.1 | 1707.9 |
| 3                | 4                     | 4                 | 1710.1              | 1715.7 | 1713.1 |
| 3                | 4                     | 5                 | 1716.6              | 1719.8 | 1720.3 |
| 3                | 5                     | 3                 | 1708.0              | 1710.1 | 1710.5 |
| 3                | 5                     | 4                 | 1713.2              | 1714.6 | 1715.5 |
| 3                | 5                     | 5                 | 1718.7              | 1720.7 | 1721.2 |
| 4                | 3                     | 3                 | 1699.7              | 1703.6 | 1703.3 |
| 4                | 3                     | 4                 | 1705.0              | 1708.8 | 1708.9 |
| 4                | 3                     | 5                 | 1711.3              | 1715.6 | 1715.7 |
| 4                | 4                     | 3                 | 1707.1              | 1710.2 | 1709.8 |
| 4                | 4                     | 4                 | 1715.4              | 1714.9 | 1715.1 |
| 4                | 4                     | 5                 | 1718.7              | 1721.9 | 1722.1 |
| 4                | 5                     | 3                 | 1710.3              | 1715.3 | 1715.5 |
| 4                | 5                     | 4                 | 1715.6              | 1717.0 | 1717.6 |
| 4                | 5                     | 5                 | 1720.9              | 1722.9 | 1723.2 |
| 5                | 3                     | 3                 | 1701.3              | 1705.3 | 1705.3 |
| 5                | 3                     | 4                 | 1706.7              | 1710.5 | 1710.9 |
| 5                | 3                     | 5                 | 1715.9              | 1717.4 | 1717.8 |
| 5                | 4                     | 3                 | 1708.9              | 1715.1 | 1711.8 |
| 5                | 4                     | 4                 | 1714.1              | 1716.8 | 1717.2 |
| 5                | 4                     | 5                 | 1720.5              | 1723.9 | 1724.2 |
| 5                | 5                     | 3                 | 1715.4              | 1714.6 | 1714.9 |
| 5                | 5                     | 4                 | 1717.7              | 1719.3 | 1720.0 |
| 5                | 5                     | 5                 | 1723.0              | 1725.3 | 1725.6 |
