# Supplementary material for: Malaria incidence from 2005–2013 and its associations with meteorological factors in Guangdong, China
Source: Springer Nature journal article supplement (doi:10.1186/s12936-015-0630-6), 2015-03-17
Supplement: MOESM3 [file 9761142]

**Additional file 3 Sensitive analyses with Likelihood Akaike information criteria for quasi-Poisson (Q-AIC) values for different models:**

The Q-AIC values of models with different degrees of freedom for lags. The bold value refers to the Q-AIC value of the final model.

| <b>df for lags</b> | <b>Q-AIC</b>  |
|--------------------|---------------|
| 3                  | <b>1697.5</b> |
| 4                  | 1713.5        |
| 5                  | 1715.9        |
